# Supplementary material
Source: MDPI journal article supplement (https://www.mdpi.com/2673-7051/1/3/24)
Supplement: s1 [file s1]

Supplementary Table S1. Multivariable repeated-measures modeling of domain outcomes.

| Domain Outcome                                                       | <i>b</i> | 95% CI       | <i>P</i> -value |
|----------------------------------------------------------------------|----------|--------------|-----------------|
| <b>Sexual behaviors (Bonferroni <math>\alpha = 0.0015</math>)</b>    |          |              |                 |
| 1. Serious convo about sex w/ friends: Y vs. N                       | .404     | .189, .618   | .0002           |
| 2. In convo, think about learned in NS? Y vs. otherwise              | 1.73     | 1.36, 2.09   | <.0001          |
| 3. In convo, share info learned in NS? Y vs. otherwise               | 2.05     | 1.64, 2.45   | <.0001          |
| 4. Ever oral sex: Y vs. N                                            | .186     | -.067, .439  | .1493           |
| 5. How old oral sex first time                                       | -.170    | -.417, .077  | .1736           |
| 6. Ever vaginal sex: Y vs. N                                         | .272     | -.151, .696  | .2069           |
| 7. How old vaginal sex first time                                    | .116     | -.107, .338  | .3046           |
| 8. Last year vaginal sex: Y vs. N                                    | .134     | -.265, .534  | .5099           |
| 9. Last month vaginal sex: Y vs. N                                   | .042     | -.384, .468  | .8469           |
| 10. Last month vaginal sex no birth control: Y vs. otherwise         | .273     | -.233, .778  | .2903           |
| 11. Use condom last time had sex: Y vs. N                            | .030     | -.580, .640  | .9228           |
| 12. How often use condom vaginal sex                                 | .028     | -.386, .442  | .8944           |
| 13. Ever anal sex: Y vs. N                                           | .017     | -.372, .405  | .9328           |
| 14. How old anal sex first time                                      | -.222    | -.470, .027  | .0764           |
| 15. Last year anal sex: Y vs. N                                      | .229     | -.276, .733  | .3740           |
| 16. Last month anal sex: Y vs. N                                     | .447     | -.288, 1.18  | .2329           |
| 17. Use condom last time anal sex: Y vs. N                           | .236     | -.617, 1.09  | .5841           |
| 18. How often use condom anal sex                                    | -.259    | -1.13, .611  | .5559           |
| 19. Forms of birth control used (all are Y vs. N)                    |          |              |                 |
| Don't use                                                            | .163     | -.161, .486  | .3247           |
| Oral                                                                 | -.061    | -.744, -.623 | .8619           |
| Condom                                                               | -.030    | -.509, .450  | .9028           |
| Shot                                                                 | .223     | -.537, .983  | .5646           |
| Patch                                                                | DNC      | -            | -               |
| Ring                                                                 | DNC      | -            | -               |
| IUD                                                                  | .916     | -.725, 2.56  | .2737           |
| Implant                                                              | .847     | -.110, 1.80  | .0828           |
| Morning after                                                        | -.288    | -1.35, .772  | .5944           |
| Other                                                                | .118     | -.836, 1.07  | .8085           |
| 20. Ever pregnant or someone pregnant: Y vs. N                       | .498     | -.076, 1.07  | .0892           |
| 21. Last year been or got pregnant: Y vs. N                          | DNC      | -            | -               |
| 22. Ever tested STD/STI: Y vs. N                                     | .347     | -.144, .839  | .1658           |
| 23. Last year tested STD/STI: Y vs. N                                | .613     | .017, 1.21   | .0439           |
| 24. Ever tested positive STD/STI: Y vs. N                            | -.756    | -1.82, .305  | .1622           |
| 25. Last year tested positive STD/STI: Y vs. N                       | DNC      | -            | -               |
| 26. Believe wait older to have sex                                   | .114     | .005, .224   | .0401           |
| 27. Believe OK to have sex if condom                                 | .092     | .008, .192   | .0007           |
| 28. Believe OK to have sex w/ a steady partner                       | .062     | .036, .160   | .0002           |
| 29. Believe condoms should always use                                | -.085    | -.211, .040  | .1826           |
| 30. How sure tell partner start condoms                              | .050     | -.008, .108  | .0883           |
| 31. How sure tell new person condoms                                 | .031     | -.004, .068  | .0648           |
| 32. How sure can use condom correctly                                | .287     | .225, .348   | <.0001          |
| 33. If wanted, how sure get condom                                   | .255     | .197, .313   | <.0001          |
| <b>Harm-bullying (Bonferroni <math>\alpha = 0.0250</math>)</b>       |          |              |                 |
| 1. Past year, been bullied: Y vs. N                                  | -.573    | -.872, -.274 | .0002           |
| 2. Past year, been emotionally abused by intimate partner: Y vs. N   | .350     | -.001, .701  | .0510           |
| <b>Harm-physical abuse (Bonferroni <math>\alpha = 0.0500</math>)</b> |          |              |                 |

| Domain Outcome                                                                                                     | <i>b</i> | 95% CI       | <i>P</i> -value |
|--------------------------------------------------------------------------------------------------------------------|----------|--------------|-----------------|
| 1. Past year, hit, slapped, physically hurt by intimate partner: Y vs. N                                           | -.169    | -.573, .235  | .4111           |
| <b>Harm-depression (Bonferroni <math>\alpha = 0.0500</math>)</b>                                                   |          |              |                 |
| 1. Past year, felt sad, lost, hopeless, lonely, or depressed: Y vs. N                                              | .028     | -.271, .327  | .8557           |
| <b>Harm-suicidal thoughts/attempt (Bonferroni <math>\alpha = 0.0167</math>)</b>                                    |          |              |                 |
| 1. Ever thought about suicide: Y vs. N                                                                             | .073     | -.267, .413  | .6735           |
| 2. Ever attempted suicide: Y vs. N                                                                                 | -.294    | -.721, .133  | .1772           |
| 3. Last year attempted suicide: Y vs. N                                                                            | -.115    | -.540, .311  | .5971           |
| <b>Social support (1=Strongly Disagree-5=Strongly Agree) (Bonferroni <math>\alpha = 0.0083</math>)</b>             |          |              |                 |
| 1. Ask help family                                                                                                 | .026     | -.048, .100  | .4966           |
| 2. Share thoughts/feelings family                                                                                  | -.029    | -.103, .045  | .4392           |
| 3. Support from friends                                                                                            | .055     | -.010, .120  | .0995           |
| 4. Talk problems with friends                                                                                      | .083     | .006, .160   | .0355           |
| 5. Factor 1 (2 items; $\alpha=0.732$ ):                                                                            | -.001    | -.068, .066  | .9754           |
| 6. Factor 2 (2 items; $\alpha=0.862$ ):                                                                            | .070     | .009, .131   | .0253           |
| <b>Community safety/community (1=Strongly Disagree-5=Strongly Agree) (Bonferroni <math>\alpha = 0.0125</math>)</b> |          |              |                 |
| 1. Feel safe                                                                                                       | .018     | -.044, .079  | .5709           |
| 2. Would miss                                                                                                      | .071     | -.004, .145  | .0637           |
| 3. Home                                                                                                            | -.064    | -.115, -.013 | .0134           |
| 4. Factor (3 items; $\alpha=0.635$ ):                                                                              | .010     | -.036, .055  | .6758           |

\*Note. RC = reference category. Because age and last grade level completed were highly correlated ( $r=.884$ ), only age was controlled for. *b* represents predicted mean change for continuous outcome measure or predicted change in log-odds for categorical outcome measures between pre- and post- controlling for gender, sexual orientation, race/ethnicity, age, and repeated measures.
